# Supplementary material for: Do Interventions with Diet or Dietary Supplements Reduce the Disease Activity Score in Rheumatoid Arthritis? A Systematic Review of Randomized Controlled Trials
Source: PubMed Central journal article supplement (PMC7600426; doi:10.3390/nu12102991), 2020-09-29
Supplement: nutrients-12-02991-s001.pdf [file nutrients-12-02991-s001.pdf]

**Table S1.** PICO (Population, Intervention, Control, Outcome) statement

|                     | <b>Inclusion criteria</b>                                                                                                                                                          | <b>Exclusion criteria</b>                                                                           |
|---------------------|------------------------------------------------------------------------------------------------------------------------------------------------------------------------------------|-----------------------------------------------------------------------------------------------------|
| <b>Participants</b> | Adults (>18 years) with Rheumatoid Arthritis                                                                                                                                       | Other rheumatoid diseases, including Juvenile Rheumatoid Arthritis or Juvenile Idiopathic Arthritis |
| <b>Intervention</b> | Dietary intervention with either diet, foods or dietary supplements. This includes whole diet, specific foods, spices, nutrients, dietary antioxidants, pre-, pro- and synbiotics. | Natural remedies of a traditional medicinal type or herbal remedies                                 |
| <b>Control</b>      | Placebo, diet representing normal intake or habitual diet                                                                                                                          | Pharmacological treatment (not also given to intervention group) or high dose vs low dose           |
| <b>Outcome</b>      | Disease activity score 28 joint count (DAS28)                                                                                                                                      |                                                                                                     |

**Table S2.** Search strategy

| <b>PubMed<br/>20190624</b> | <b>Search string</b>                                                                                                                                                                                                                                                                                                                                                                                                                                                        | <b>Number of<br/>results</b> |
|----------------------------|-----------------------------------------------------------------------------------------------------------------------------------------------------------------------------------------------------------------------------------------------------------------------------------------------------------------------------------------------------------------------------------------------------------------------------------------------------------------------------|------------------------------|
| #16                        | #12 NOT #15                                                                                                                                                                                                                                                                                                                                                                                                                                                                 | 462                          |
| #15                        | #13 OR #14                                                                                                                                                                                                                                                                                                                                                                                                                                                                  |                              |
| #14                        | animals[ti] OR animal[ti] OR rats[ti] OR rat[ti] OR mouse[ti] OR mice[ti] or monkey*[ti] or primate*[ti]                                                                                                                                                                                                                                                                                                                                                                    |                              |
| #13                        | ((animals[mh]) NOT (animals[mh] AND humans[mh]))                                                                                                                                                                                                                                                                                                                                                                                                                            |                              |
| #12                        | #10 AND #11                                                                                                                                                                                                                                                                                                                                                                                                                                                                 | 488                          |
| #11                        | "randomized controlled trial"[pt] OR "controlled clinical trial"[pt] OR randomized[tiab] OR randomised[tiab] OR placebo[tiab] OR "drug therapy"[sh] OR randomly[tiab] OR trial[tiab] OR groups[tiab] OR RCT[tiab]                                                                                                                                                                                                                                                           |                              |
| #10                        | #3 AND #6 AND #9                                                                                                                                                                                                                                                                                                                                                                                                                                                            | 780                          |
| #9                         | #7 OR #8                                                                                                                                                                                                                                                                                                                                                                                                                                                                    | 275526                       |
| #8                         | DAS[tiab] OR DAS28[tiab] OR disease activity[tiab] OR patient acuity[tiab]                                                                                                                                                                                                                                                                                                                                                                                                  | 47092                        |
| #7                         | patient acuity[mesh]                                                                                                                                                                                                                                                                                                                                                                                                                                                        | 237070                       |
| #6                         | #4 OR #5                                                                                                                                                                                                                                                                                                                                                                                                                                                                    | 3177270                      |
| #5                         | diet[tiab] OR dietary[tiab] OR food[tiab] OR nutrition*[tiab] OR probiotic*[tiab] OR prebiotic*[tiab] OR symbiotic*[tiab] OR supplement*[tiab] OR selenium[tiab] OR zinc[tiab] OR vitamin*[tiab] OR antioxidant*[tiab] OR curcuma*[tiab] OR tumeric[tiab] OR turmeric[tiab] OR ginger[tiab] OR zingiber[tiab] OR garlic[tiab] OR vegan*[tiab] OR vegetarian*[tiab] OR polyphenol*[tiab] OR spices[tiab] OR fatty acid*[tiab] OR omega*[tiab] OR plant[tiab] OR plants[tiab] | 2132349                      |
| #4                         | diet, food, and nutrition[mesh] OR plants[mesh] OR nutrition therapy[mesh] OR fatty acids[mesh]                                                                                                                                                                                                                                                                                                                                                                             | 1989641                      |
| #3                         | #1 OR #2                                                                                                                                                                                                                                                                                                                                                                                                                                                                    | 141680                       |
| #2                         | rheumatoid arthritis[tiab] OR arthritis rheumatoid[tiab]                                                                                                                                                                                                                                                                                                                                                                                                                    | 100672                       |
| #1                         | Arthritis, Rheumatoid[mesh]                                                                                                                                                                                                                                                                                                                                                                                                                                                 | 108732                       |

| <b>Scopus<br/>20190624</b> | <b>Search string</b><br>TITLE-ABS-KEY for #1-#6                                                                                                                                                                                                                                                                 | <b>Number of<br/>results</b> |
|----------------------------|-----------------------------------------------------------------------------------------------------------------------------------------------------------------------------------------------------------------------------------------------------------------------------------------------------------------|------------------------------|
| #8                         | #6 AND NOT #7                                                                                                                                                                                                                                                                                                   | 701                          |
| #7                         | TITLE(animals OR animal OR rats OR rat OR mouse OR mice OR monkey* OR primate*)                                                                                                                                                                                                                                 |                              |
| #6                         | #4 AND #5                                                                                                                                                                                                                                                                                                       | 709                          |
| #5                         | randomized OR randomised OR placebo OR "drug therapy" OR randomly OR trial OR groups OR RCT                                                                                                                                                                                                                     |                              |
| #4                         | #1 AND #2 AND #3                                                                                                                                                                                                                                                                                                | 1188                         |
| #3                         | DAS OR DAS28 OR "disease activity" OR "patient acuity"                                                                                                                                                                                                                                                          | 526965                       |
| #2                         | diet OR dietary OR food OR nutrition* OR probiotic* OR prebiotic* OR symbiotic* OR supplement* OR selenium OR zinc OR vitamin* OR antioxidant* OR curcuma* OR tumeric OR turmeric OR ginger OR zingiber OR garlic OR vegan* OR vegetarian* OR polyphenol* OR spices OR fatty acid* OR omega* OR plant OR plants | 4040696                      |
| #1                         | "rheumatoid arthritis" OR "arthritis rheumatoid"                                                                                                                                                                                                                                                                | 187811                       |

| <b>Cochrane<br/>Library<br/>20190624</b> | <b>Search string</b><br>TITLE-ABSTRACT-KEYWORDfor #1-#6                                                                                                                                                                                                                                                         | <b>Number of<br/>results</b> |
|------------------------------------------|-----------------------------------------------------------------------------------------------------------------------------------------------------------------------------------------------------------------------------------------------------------------------------------------------------------------|------------------------------|
| #8                                       | #6 AND NOT #7                                                                                                                                                                                                                                                                                                   | 376                          |
| #7                                       | (animals OR animal OR rats OR rat OR mouse OR mice OR monkey* OR primate*):ti                                                                                                                                                                                                                                   |                              |
| #6                                       | #4 AND #5                                                                                                                                                                                                                                                                                                       | 376                          |
| #5                                       | randomized OR randomised OR placebo OR "drug therapy" OR randomly OR trial OR groups OR RCT                                                                                                                                                                                                                     |                              |
| #4                                       | #1 AND #2 AND #3                                                                                                                                                                                                                                                                                                | 394                          |
| #3                                       | DAS OR DAS28 OR "disease activity" OR "patient acuity"                                                                                                                                                                                                                                                          | 15495                        |
| #2                                       | diet OR dietary OR food OR nutrition* OR probiotic* OR prebiotic* OR symbiotic* OR supplement* OR selenium OR zinc OR vitamin* OR antioxidant* OR curcuma* OR tumeric OR turmeric OR ginger OR zingiber OR garlic OR vegan* OR vegetarian* OR polyphenol* OR spices OR fatty acid* OR omega* OR plant OR plants | 182324                       |
| #1                                       | "rheumatoid arthritis" OR "arthritis rheumatoid"                                                                                                                                                                                                                                                                | 14827                        |
